# Supplementary material
Source: PubMed Central journal article supplement (PMC5512333)
Supplement: Supp_Table1.pdf [file Supp_Table1.pdf]

## Supplementary Data

SUPPLEMENTARY TABLE S1. CHANGE IN PERCENTAGE OF SUPERFICIAL CELLS FROM BASELINE TO WEEKS 2 AND 12

|                        | Time point (week) | Placebo (N=187) |             | TX-004HR 4 µg (N=186) |              |         | TX-004HR 10 µg (N=188) |              |         | TX-004HR 25 µg (N=186) |              |         |
|------------------------|-------------------|-----------------|-------------|-----------------------|--------------|---------|------------------------|--------------|---------|------------------------|--------------|---------|
|                        |                   | LS              |             | LS                    |              | p       | LS                     |              | p       | LS                     |              | p       |
|                        |                   | n               | mean ± SE   | n                     | mean ± SE    |         | n                      | mean ± SE    |         | n                      | mean ± SE    |         |
| Age, years             |                   |                 |             |                       |              |         |                        |              |         |                        |              |         |
| ≤56                    | 2                 | 61              | 8.72 ± 2.64 | 57                    | 34.60 ± 2.74 | <0.0001 | 72                     | 33.02 ± 2.44 | <0.0001 | 72                     | 39.67 ± 2.43 | <0.0001 |
|                        | 12                | 56              | 7.31 ± 2.73 | 51                    | 17.23 ± 2.85 | 0.0122  | 67                     | 14.93 ± 2.50 | 0.0403  | 70                     | 22.45 ± 2.45 | <0.0001 |
| 57–61                  | 2                 | 59              | 3.69 ± 2.68 | 60                    | 29.43 ± 2.66 | <0.0001 | 59                     | 31.42 ± 2.67 | <0.0001 | 51                     | 38.03 ± 2.87 | <0.0001 |
|                        | 12                | 56              | 5.22 ± 2.72 | 57                    | 18.74 ± 2.70 | 0.0005  | 54                     | 19.62 ± 2.76 | 0.0002  | 47                     | 28.18 ± 2.94 | <0.0001 |
| ≥62                    | 2                 | 65              | 5.36 ± 2.41 | 69                    | 30.48 ± 2.34 | <0.0001 | 57                     | 31.15 ± 2.58 | <0.0001 | 61                     | 38.52 ± 2.49 | <0.0001 |
|                        | 12                | 60              | 4.05 ± 2.49 | 62                    | 16.75 ± 2.44 | 0.0003  | 50                     | 16.18 ± 2.71 | 0.0010  | 57                     | 19.96 ± 2.56 | <0.0001 |
| BMI, kg/m <sup>2</sup> |                   |                 |             |                       |              |         |                        |              |         |                        |              |         |
| ≤24                    | 2                 | 68              | 6.40 ± 2.43 | 71                    | 34.09 ± 2.38 | <0.0001 | 67                     | 35.23 ± 2.45 | <0.0001 | 60                     | 43.65 ± 2.58 | <0.0001 |
|                        | 12                | 61              | 3.49 ± 2.53 | 67                    | 18.78 ± 2.43 | <0.0001 | 63                     | 18.33 ± 2.52 | <0.0001 | 56                     | 24.75 ± 2.65 | <0.0001 |
| 25–28                  | 2                 | 62              | 4.47 ± 2.57 | 52                    | 31.62 ± 2.82 | <0.0001 | 62                     | 29.61 ± 2.58 | <0.0001 | 66                     | 38.21 ± 2.50 | <0.0001 |
|                        | 12                | 58              | 7.04 ± 2.63 | 47                    | 15.91 ± 2.91 | 0.0243  | 56                     | 19.04 ± 2.67 | 0.0014  | 63                     | 23.43 ± 2.54 | <0.0001 |
| ≥29                    | 2                 | 55              | 7.13 ± 2.72 | 63                    | 28.32 ± 2.55 | <0.0001 | 59                     | 30.95 ± 2.63 | <0.0001 | 58                     | 34.18 ± 2.64 | <0.0001 |
|                        | 12                | 53              | 6.35 ± 2.76 | 56                    | 17.73 ± 2.66 | 0.0031  | 52                     | 12.85 ± 2.75 | 0.0962  | 55                     | 21.04 ± 2.69 | 0.0002  |
| Uterine status         |                   |                 |             |                       |              |         |                        |              |         |                        |              |         |
| Intact                 | 2                 | 114             | 4.80 ± 1.88 | 99                    | 31.60 ± 2.01 | <0.0001 | 102                    | 29.97 ± 1.98 | <0.0001 | 99                     | 39.01 ± 2.01 | <0.0001 |
|                        | 12                | 107             | 4.60 ± 1.92 | 92                    | 18.93 ± 2.06 | <0.0001 | 95                     | 18.76 ± 2.03 | <0.0001 | 94                     | 23.04 ± 2.04 | <0.0001 |
| Nonintact              | 2                 | 71              | 7.94 ± 2.46 | 87                    | 31.14 ± 2.23 | <0.0001 | 86                     | 34.29 ± 2.24 | <0.0001 | 85                     | 38.66 ± 2.25 | <0.0001 |
|                        | 12                | 65              | 7.15 ± 2.54 | 78                    | 15.89 ± 2.32 | 0.0111  | 76                     | 14.12 ± 2.35 | 0.0442  | 80                     | 23.37 ± 2.30 | <0.0001 |
| Pregnancy status       |                   |                 |             |                       |              |         |                        |              |         |                        |              |         |
| n=0                    | 2                 | 21              | 4.87 ± 3.91 | 23                    | 29.69 ± 3.72 | <0.0001 | 22                     | 35.02 ± 3.84 | <0.0001 | 16                     | 44.08 ± 4.54 | <0.0001 |
|                        | 12                | 19              | 3.60 ± 4.06 | 21                    | 22.38 ± 3.86 | 0.0009  | 22                     | 14.43 ± 3.84 | 0.0546  | 16                     | 22.39 ± 4.54 | 0.0024  |
| n≥1                    | 2                 | 164             | 6.29 ± 1.61 | 163                   | 31.65 ± 1.62 | <0.0001 | 166                    | 31.49 ± 1.60 | <0.0001 | 168                    | 38.19 ± 1.59 | <0.0001 |
|                        | 12                | 153             | 5.99 ± 1.65 | 149                   | 16.87 ± 1.67 | <0.0001 | 149                    | 17.02 ± 1.66 | <0.0001 | 158                    | 23.11 ± 1.62 | <0.0001 |
| Vaginal birth          |                   |                 |             |                       |              |         |                        |              |         |                        |              |         |
| n=0                    | 2                 | 34              | 5.71 ± 3.51 | 26                    | 41.58 ± 4.01 | <0.0001 | 39                     | 25.87 ± 3.28 | <0.0001 | 36                     | 45.94 ± 3.40 | <0.0001 |
|                        | 12                | 30              | 8.31 ± 3.69 | 24                    | 20.01 ± 4.13 | 0.0351  | 33                     | 20.65 ± 3.49 | 0.0155  | 33                     | 28.94 ± 3.51 | 0.0001  |
| n≥1                    | 2                 | 130             | 6.40 ± 1.80 | 137                   | 29.76 ± 1.75 | <0.0001 | 127                    | 33.28 ± 1.82 | <0.0001 | 132                    | 36.05 ± 1.78 | <0.0001 |
|                        | 12                | 123             | 5.41 ± 1.83 | 125                   | 16.28 ± 1.81 | <0.0001 | 116                    | 16.07 ± 1.88 | 0.0001  | 125                    | 21.50 ± 1.82 | <0.0001 |

BMI, body mass index; LS, least square; SE, standard error.
