# Supplementary material
Source: PubMed Central journal article supplement (PMC5512333)
Supplement: Supp_Table2.pdf [file Supp_Table2.pdf]

SUPPLEMENTARY TABLE S2. CHANGE IN VAGINAL pH FROM BASELINE TO WEEKS 2 AND 12

|                        | Time point (week) | Placebo (N=187) |              | TX-004HR 4 µg (N=186) |              |         | TX-004HR 10 µg (N=188) |              |         | TX-004HR 25 µg (N=186) |              |         |
|------------------------|-------------------|-----------------|--------------|-----------------------|--------------|---------|------------------------|--------------|---------|------------------------|--------------|---------|
|                        |                   | LS              |              | LS                    |              | p       | LS                     |              | p       | LS                     |              | p       |
|                        |                   | n               | mean ± SE    | n                     | mean ± SE    |         | n                      | mean ± SE    |         | n                      | mean ± SE    |         |
| Age, years             |                   |                 |              |                       |              |         |                        |              |         |                        |              |         |
| ≤56                    | 2                 | 61              | -0.32 ± 0.11 | 57                    | -1.13 ± 0.11 | <0.0001 | 72                     | -1.19 ± 0.10 | <0.0001 | 72                     | -1.27 ± 0.10 | <0.0001 |
|                        | 12                | 56              | -0.48 ± 0.11 | 51                    | -1.36 ± 0.11 | <0.0001 | 67                     | -1.30 ± 0.10 | <0.0001 | 70                     | -1.38 ± 0.10 | <0.0001 |
| 57–61                  | 2                 | 59              | -0.34 ± 0.12 | 60                    | -1.23 ± 0.11 | <0.0001 | 59                     | -1.59 ± 0.12 | <0.0001 | 51                     | -1.34 ± 0.12 | <0.0001 |
|                        | 12                | 58              | -0.34 ± 0.12 | 57                    | -1.37 ± 0.12 | <0.0001 | 54                     | -1.58 ± 0.12 | <0.0001 | 47                     | -1.42 ± 0.13 | <0.0001 |
| ≥62                    | 2                 | 66              | -0.18 ± 0.11 | 69                    | -1.31 ± 0.11 | <0.0001 | 57                     | -1.37 ± 0.12 | <0.0001 | 61                     | -1.32 ± 0.12 | <0.0001 |
|                        | 12                | 60              | -0.05 ± 0.12 | 62                    | -1.23 ± 0.11 | <0.0001 | 50                     | -1.40 ± 0.13 | <0.0001 | 57                     | -1.24 ± 0.12 | <0.0001 |
| BMI, kg/m <sup>2</sup> |                   |                 |              |                       |              |         |                        |              |         |                        |              |         |
| ≤24                    | 2                 | 69              | -0.26 ± 0.10 | 71                    | 1.43 ± 0.10  | <0.0001 | 67                     | -1.47 ± 0.10 | <0.0001 | 60                     | -1.40 ± 0.10 | <0.0001 |
|                        | 12                | 61              | -0.17 ± 0.10 | 67                    | -1.54 ± 0.10 | <0.0001 | 63                     | -1.52 ± 0.10 | <0.0001 | 56                     | -1.49 ± 0.10 | <0.0001 |
| 25–28                  | 2                 | 62              | -0.19 ± 0.12 | 52                    | -1.15 ± 0.13 | <0.0001 | 62                     | -1.34 ± 0.12 | <0.0001 | 66                     | -1.32 ± 0.12 | <0.0001 |
|                        | 12                | 60              | -0.29 ± 0.12 | 47                    | -1.30 ± 0.14 | <0.0001 | 56                     | -1.50 ± 0.13 | <0.0001 | 63                     | -1.22 ± 0.12 | <0.0001 |
| ≥29                    | 2                 | 55              | -0.40 ± 0.12 | 63                    | -1.09 ± 0.11 | <0.0001 | 59                     | -1.30 ± 0.11 | <0.0001 | 58                     | -1.18 ± 0.11 | <0.0001 |
|                        | 12                | 53              | -0.40 ± 0.12 | 56                    | -1.08 ± 0.11 | <0.0001 | 52                     | -1.23 ± 0.12 | <0.0001 | 55                     | -1.31 ± 0.12 | <0.0001 |
| Uterine status         |                   |                 |              |                       |              |         |                        |              |         |                        |              |         |
| Intact                 | 2                 | 114             | -0.24 ± 0.09 | 99                    | -1.26 ± 0.09 | <0.0001 | 102                    | -1.45 ± 0.09 | <0.0001 | 99                     | -1.41 ± 0.09 | <0.0001 |
|                        | 12                | 108             | -0.24 ± 0.09 | 92                    | -1.42 ± 0.09 | <0.0001 | 95                     | -1.43 ± 0.09 | <0.0001 | 94                     | -1.38 ± 0.09 | <0.0001 |
| Nonintact              | 2                 | 72              | -0.36 ± 0.10 | 87                    | -1.20 ± 0.09 | <0.0001 | 86                     | -1.28 ± 0.09 | <0.0001 | 85                     | -1.18 ± 0.09 | <0.0001 |
|                        | 12                | 66              | -0.38 ± 0.10 | 78                    | -1.20 ± 0.09 | <0.0001 | 76                     | -1.40 ± 0.09 | <0.0001 | 80                     | -1.29 ± 0.09 | <0.0001 |
| Pregnancy status       |                   |                 |              |                       |              |         |                        |              |         |                        |              |         |
| n=0                    | 2                 | 21              | -0.33 ± 0.18 | 23                    | -1.14 ± 0.17 | 0.0009  | 22                     | -1.34 ± 0.17 | 0.0001  | 16                     | -1.19 ± 0.21 | 0.0017  |
|                        | 12                | 19              | -0.20 ± 0.18 | 21                    | -1.25 ± 0.17 | <0.0001 | 22                     | -1.42 ± 0.17 | <0.0001 | 16                     | -1.47 ± 0.21 | <0.0001 |
| n≥1                    | 2                 | 165             | -0.27 ± 0.07 | 163                   | -1.24 ± 0.07 | <0.0001 | 166                    | -1.38 ± 0.07 | <0.0001 | 168                    | -1.32 ± 0.07 | <0.0001 |
|                        | 12                | 155             | -0.29 ± 0.07 | 149                   | -1.33 ± 0.07 | <0.0001 | 149                    | -1.42 ± 0.07 | <0.0001 | 158                    | -1.33 ± 0.07 | <0.0001 |
| Vaginal birth          |                   |                 |              |                       |              |         |                        |              |         |                        |              |         |
| n=0                    | 2                 | 34              | -0.09 ± 0.15 | 26                    | -0.93 ± 0.18 | 0.0004  | 39                     | -1.36 ± 0.14 | <0.0001 | 36                     | -1.45 ± 0.15 | <0.0001 |
|                        | 12                | 30              | -0.24 ± 0.16 | 24                    | -1.24 ± 0.18 | <0.0001 | 33                     | -1.47 ± 0.15 | <0.0001 | 33                     | -1.43 ± 0.15 | <0.0001 |
| n≥1                    | 2                 | 131             | -0.31 ± 0.08 | 137                   | -1.30 ± 0.08 | <0.0001 | 127                    | -1.38 ± 0.08 | <0.0001 | 132                    | -1.28 ± 0.08 | <0.0001 |
|                        | 12                | 125             | -0.31 ± 0.08 | 125                   | -1.34 ± 0.08 | <0.0001 | 116                    | -1.41 ± 0.08 | <0.0001 | 125                    | -1.30 ± 0.08 | <0.0001 |
