# Supplementary material
Source: PubMed Central journal article supplement (PMC5512333)
Supplement: Supp_Table3.pdf [file Supp_Table3.pdf]

SUPPLEMENTARY TABLE S3. CHANGE IN THE SEVERITY OF DYSPAREUNIA FROM BASELINE TO WEEKS 2 AND 12

|                        | Time point (week) | Placebo (N=187) |            | TX-004HR 4 µg (N=186) |            |        | TX-004HR 10 µg (N=188) |            |         | TX-004HR 25 µg (N=186) |            |        |
|------------------------|-------------------|-----------------|------------|-----------------------|------------|--------|------------------------|------------|---------|------------------------|------------|--------|
|                        |                   | LS              |            | LS                    |            | p      | LS                     |            | p       | LS                     |            | p      |
|                        |                   | n               | mean ± SE  | n                     | mean ± SE  |        | n                      | mean ± SE  |         | n                      | mean ± SE  |        |
| Age, years             |                   |                 |            |                       |            |        |                        |            |         |                        |            |        |
| ≤56                    | 2                 | 50              | -0.74±0.12 | 48                    | -1.02±0.12 | 0.1101 | 55                     | -1.16±0.12 | 0.0125  | 60                     | -1.03±0.11 | 0.0757 |
|                        | 12                | 52              | -1.25±0.12 | 50                    | -1.58±0.12 | 0.0539 | 61                     | -1.77±0.11 | 0.0015  | 65                     | -1.86±0.11 | 0.0002 |
| 57–61                  | 2                 | 46              | -0.80±0.12 | 45                    | -0.77±0.12 | 0.8391 | 49                     | -1.12±0.12 | 0.0715  | 41                     | -1.14±0.13 | 0.0624 |
|                        | 12                | 53              | -1.39±0.12 | 50                    | -1.42±0.12 | 0.8366 | 49                     | -1.63±0.12 | 0.1488  | 47                     | -1.79±0.13 | 0.0189 |
| ≥62                    | 2                 | 45              | -0.74±0.13 | 52                    | -1.12±0.13 | 0.0339 | 43                     | -0.95±0.14 | 0.2577  | 39                     | -0.93±0.14 | 0.3090 |
|                        | 12                | 58              | -1.19±0.12 | 51                    | -1.52±0.13 | 0.0580 | 44                     | -1.66±0.14 | 0.0099  | 47                     | -1.38±0.14 | 0.2888 |
| BMI, kg/m <sup>2</sup> |                   |                 |            |                       |            |        |                        |            |         |                        |            |        |
| ≤24                    | 2                 | 51              | -0.73±0.12 | 55                    | -1.14±0.12 | 0.0141 | 51                     | -1.17±0.12 | 0.0106  | 46                     | -1.07±0.13 | 0.0512 |
|                        | 12                | 56              | -1.14±0.12 | 58                    | -1.48±0.11 | 0.0340 | 56                     | -1.60±0.12 | 0.0055  | 51                     | -1.72±0.12 | 0.0006 |
| 25–28                  | 2                 | 44              | -0.85±0.13 | 45                    | -0.89±0.13 | 0.8191 | 47                     | -1.08±0.13 | 0.2095  | 52                     | -1.04±0.12 | 0.2934 |
|                        | 12                | 57              | -1.48±0.12 | 45                    | -1.51±0.13 | 0.8404 | 52                     | -1.78±0.12 | 0.0829  | 58                     | -1.77±0.12 | 0.0756 |
| ≥29                    | 2                 | 46              | -0.68±0.13 | 45                    | -0.87±0.13 | 0.2803 | 49                     | -0.99±0.13 | 0.0777  | 42                     | -0.97±0.13 | 0.1104 |
|                        | 12                | 50              | -1.21±0.13 | 48                    | -1.56±0.13 | 0.0509 | 46                     | -1.71±0.13 | 0.0052  | 50                     | -1.57±0.12 | 0.0403 |
| Uterine status         |                   |                 |            |                       |            |        |                        |            |         |                        |            |        |
| Intact                 | 2                 | 87              | -0.77±0.09 | 77                    | -1.05±0.10 | 0.0323 | 78                     | -1.08±0.10 | 0.0193  | 76                     | -1.16±0.10 | 0.0036 |
|                        | 12                | 101             | -1.35±0.09 | 82                    | -1.66±0.10 | 0.0161 | 84                     | -1.74±0.10 | 0.0024  | 85                     | -1.81±0.10 | 0.0003 |
| Nonintact              | 2                 | 54              | -0.74±0.12 | 68                    | -0.91±0.11 | 0.3018 | 69                     | -1.07±0.11 | 0.0378  | 64                     | -0.86±0.11 | 0.4505 |
|                        | 12                | 62              | -1.15±0.12 | 69                    | -1.35±0.11 | 0.2046 | 70                     | -1.63±0.11 | 0.0029  | 74                     | -1.55±0.11 | 0.0117 |
| Pregnancy status       |                   |                 |            |                       |            |        |                        |            |         |                        |            |        |
| n=0                    | 2                 | 17              | -0.32±0.22 | 15                    | -0.80±0.23 | 0.1294 | 16                     | -0.99±0.22 | 0.0300  | 10                     | -1.28±0.28 | 0.0072 |
|                        | 12                | 16              | -1.18±0.22 | 17                    | -1.28±0.22 | 0.7585 | 19                     | -1.26±0.21 | 0.7986  | 13                     | -1.64±0.26 | 0.1831 |
| n≥1                    | 2                 | 124             | -0.81±0.08 | 130                   | -1.01±0.08 | 0.0703 | 131                    | -1.09±0.08 | 0.0110  | 130                    | -1.01±0.08 | 0.0711 |
|                        | 12                | 147             | -1.28±0.07 | 134                   | -1.55±0.08 | 0.0124 | 135                    | -1.74±0.08 | <0.0001 | 146                    | -1.70±0.07 | 0.0001 |
| Vaginal birth          |                   |                 |            |                       |            |        |                        |            |         |                        |            |        |
| n=0                    | 2                 | 23              | -0.90±0.18 | 16                    | -1.10±0.21 | 0.4742 | 28                     | -1.02±0.16 | 0.6222  | 28                     | -0.97±0.16 | 0.7669 |
|                        | 12                | 26              | -1.19±0.17 | 22                    | -1.74±0.19 | 0.0309 | 29                     | -1.68±0.16 | 0.0359  | 31                     | -1.76±0.16 | 0.0150 |
| n≥1                    | 2                 | 101             | -0.79±0.09 | 114                   | -0.99±0.08 | 0.0817 | 103                    | -1.11±0.09 | 0.0064  | 102                    | -1.02±0.09 | 0.0515 |
|                        | 12                | 121             | -1.30±0.08 | 112                   | -1.51±0.08 | 0.0665 | 106                    | -1.77±0.09 | 0.0001  | 115                    | -1.69±0.08 | 0.0007 |
